# Supplementary material for: Sea cucumber peptides positively regulate sexual hormones in male mice with acute exhaustive swimming: possibly through the Ca2+/PKA signaling pathway
Source: Royal Society of Chemistry journal article supplement (doi:10.1039/d3fo03031h), 2023-01-01
Supplement: d3fo03031h1.pdf [file d3fo03031h1.pdf]

**Bands of  $\beta$ -actin**

Note: Blank (Blank+Vehicle), AES (AES+Vehicle), SCPL (AES+SCPL), SCPH (AES+SCPH)

**Bands of  $\beta$ -actin (merged with marker)**

Note: Blank (Blank+Vehicle), AES (AES+Vehicle), SCPL (AES+SCPL), SCPH (AES+SCPH)

## **Bands of PKA**

Note: Blank (Blank+Vehicle), AES (AES+Vehicle), SCPL (AES+SCPL), SCPH (AES+SCPH)

### **Bands of PKA (merged with marker)**

Note: Blank (Blank+Vehicle), AES (AES+Vehicle), SCPL (AES+SCPL), SCPH (AES+SCPH)

## **Bands of p-PKA**

Note: Blank (Blank+Vehicle), AES (AES+Vehicle), SCPL (AES+SCPL), SCPH (AES+SCPH)

## **Bands of p-PKA (merged with marker)**

Note: Blank (Blank+Vehicle), AES (AES+Vehicle), SCPL (AES+SCPL), SCPH (AES+SCPH)
