# Supplementary material for: Sea cucumber peptides positively regulate sexual hormones in male mice with acute exhaustive swimming: possibly through the Ca2+/PKA signaling pathway
Source: Royal Society of Chemistry journal article supplement (doi:10.1039/d3fo03031h), 2023-01-01
Supplement: d3fo03031h2.pdf [file d3fo03031h2.pdf]

## Supplementary materials

### Text S1 Behavioral indexes of copulatory test

A series of behavioral indexes recorded in the present study were listed as follow<sup>1</sup>: Capture times (CT) are the number of the male mouse captures the female mouse; Mounting latency (ML) means the time taken for the first mount following the introduction of female; Mounting frequency (MF) is the total number of mounting; Intromission latency (IL) is the time taken for first intromission following introduction of the female; Intromission frequency (IF) is the total number of intromission; Ejaculation latency (EL) is the time interval between first mount with pelvic thrusting and vaginal penetration to ejaculation; Ejaculation frequency (EF) means the total number of ejaculation; Post-ejaculatory intervals (PEI) are the interval between first ejaculation and the following intromission. After sexual behavior test, the serum of male mice was obtained to measure the related biochemical parameters. Testis, seminal vesicle, epididymis, and penis tissue etc were collected and weighted, and one side of testis was stored at 10% formalin and the another part were collected for histological analysis and biochemical, respectively. All female mice were euthanized after experiment.

### Text S2 Hematoxyli-eosin (HE) staining, immunohistochemistry (IHC) and immunofluorescence (IF)

The harvested testis, epididymis, and liver tissues were fixed in 4% paraformaldehyde solution for 48 h and embedded in paraffin. Then the tissues were sliced into 5 µm sections, and examined by hematoxylin-eosin (HE) staining. The stained slides were observed using a microscope (Leica, Germany).

For IHC assay, testis tissues were fixed and embedded in paraffin. In brief, paraffin sections were incubated with primary antibodies against StAR (1:100 dilution, Proteintech Group, USA) and HSD17B3 (1:100 dilution, Proteintech Group, USA) for overnight at 4 °C. Subsequently, the tissue sections were incubated with horseradish peroxidase (HRP)-conjugated goat anti-rabbit secondary antibody (1:4000). Then the sections were washed with phosphate buffered saline (PBS) and added with 3,3-diaminobenzidine tetrahydrochloride Dihydrate (DAB) to react for 10 min at room temperature. All sections were counterstained with hematoxylin. Immunostaining was observed using a microscope (Leica, Germany) and captured by a slice scanner (PANNORAMIC, 3DHISTECH).

For the IF assay, testis tissue sections were blocked with 1% bovine serum albumin and then incubated with primary antibodies CYP17A1 (1:200, Proteintech Group, USA) for overnight at 4 °C. The sections were then incubated with fluorescence-conjugated secondary antibodies at room temperature for 2 h. Finally, the nuclei of cells were stained by 4',6-diamidino-2-phenylindole (DAPI). Images were taken under a fluorescence microscope (Nikon, Japan). The final score was calculated by multiplying the intensity scores with staining range using ImagePro Plus 6 software.

### **Text S3 Untargeted Metabolomics Methods**

#### **(1) Sample Collection and Preparation**

Each aliquot (150 µL) of the serum sample was stored at –80 °C until UPLC-Q-TOF/MS analysis. The serum samples were thawed at 4°C and 100 µL aliquots were mixed with 400 µL of cold methanol/acetonitrile (1:1, v/v) to remove the protein. The mixture was centrifuged for 15 min (14000g, 4°C). The supernatant was dried in a vacuum centrifuge. For LC-MS analysis, the samples were re-dissolved in 100 µL acetonitrile/water (1:1, v/v) solvent. To monitor the stability and repeatability of instrument analysis, quality control (QC) samples were prepared by pooling 10 µL of each sample and analyzed together with the other samples. The QC samples were inserted regularly and analyzed in every 5 samples.

#### **(2) LC-MS/MS Analysis**

Untargeted metabolomics samples were performed using an UHPLC (1290 Infinity LC, Agilent Technologies) coupled to a quadrupole time-of-flight (AB Sciex TripleTOF 6600).

For HILIC separation, samples were analyzed using a 2.1 mm × 100 mm ACQUITY UPLC BEH 1.7 µm column (waters, Ireland). In both ESI positive and negative modes, the mobile phase contained A = 25 mM ammonium acetate and 25 mM ammonium hydroxide in water and B= acetonitrile. The gradient was 85% B for 1 min and was linearly reduced to 65% in 11 min, and then was reduced to 40% in 0.1 min and kept for 4 min, and then increased to 85% in 0.1 min, with a 5 min re-equilibration period employed.

The ESI source conditions were set as follows: Ion Source Gas1 (Gas1) as 60, Ion Source Gas2 (Gas2) as 60, curtain gas (CUR) as 30, source temperature: 600°C, IonSpray Voltage Floating (ISVF) ± 5500 V. In MS only acquisition, the instrument was set to acquire over the m/z range 60-1000 Da, and the accumulation time for TOF MS scan was set at 0.20 s/spectra. In auto MS/MS acquisition, the instrument was set to acquire over the m/z range 25-1000 Da, and

the accumulation time for product ion scan was set at 0.05 s/spectra. The product ion scan is acquired using information dependent acquisition (IDA) with high sensitivity mode selected. The parameters were set as follows: the collision energy (CE) was fixed at 35 V with  $\pm 15$  eV; declustering potential (DP), 60 V (+) and -60 V (-); exclude isotopes within 4 Da, candidate ions to monitor per cycle: 10.

### **(3) Data processing**

The raw MS data (wiff.scan files) were converted to MzXML files using ProteoWizard MSConvert before importing into freely available XCMS software. For peak picking, the following parameters were used: centWave  $m/z = 25$  ppm, peakwidth = c (10, 60), prefilter = c (10, 100). For peak grouping, bw = 5, mzwid = 0.025, minfrac = 0.5 were used. CAMERA (Collection of Algorithms of MEtabolite pRofile Annotation) was used for annotation of isotopes and adducts. In the extracted ion features, only the variables having more than 50% of the nonzero measurement values in at least one group were kept. Compound identification of metabolites was performed by comparing of accuracy  $m/z$  value ( $<25$  ppm), and MS/MS spectra with an in-house database established with available authentic standards.

### **(4) Statistical analysis**

After normalized to total peak intensity, the processed data were uploaded into MetaboAnalyst software for further analysis ([www.metaboanalyst.ca](http://www.metaboanalyst.ca)). Principal component analysis (PCA) and partial least square discriminant analysis (PLS-DA) were performed for both positive and negative models after log transformation and Pareto-scaling. The variable importance in the projection (VIP) value of each variable in the PLS-DA model was calculated to indicate its contribution to the classification. Metabolites with the VIP value  $>1$  was further applied to Student's t-test at univariate level to measure the significance of each metabolite,  $p < 0.05$  were considered as statistically significant.

## **Text S4 Transcriptomics analysis of testis**

### **1. Construction and sequencing of cDNA library for RNA seq**

#### **(1) Total RNA extraction**

The conventional Trizol method was employed to extract total RNA from testicular tissue. The concentration and purity of the extracted RNA were detected using Nanodrop (the concentration of RNA should greater than 50 ng/ $\mu$ L, the values of OD<sub>260</sub>/280 were between 1.8

and 2.2). RNA integrity was detected by agarose gel electrophoresis and RIN value was determined by Agilent 2100.

(2) Oligo dT enriched mRNA, reverse transcription, and linker adapter

The magnetic beads with Oligo dT were paired with ployA for A-T bases, and mRNA was isolated from total RNA for analysis of transcriptome information. Under the action of reverse transcriptase, stable double stranded cDNA was synthesized by reverse transcription using mRNA as a template. Add End repair mix to double stranded cDNA to form a flat end and add an A base at the 3 'end to connect the Y-shaped junction.

(3) RNA seq fragment screening, library enrichment, and sequencing

Purify and sort the products connected to the adapter mentioned above, and then perform PCR amplification to obtain the final library. Utilizing QuantiFluor ® Quantitative analysis was conducted using the dsDNA System. Cluster was generated by bridge PCR amplification on cBot and then sequenced using Illumina.

## **2. RNA seq data quality control and de novo assembly**

The specific operation is as follows:

(1) Remove the joint sequence from reads;

(2) Cut off bases with a mass less than 20 and remove reads with a N content ratio exceeding 10%;

(3) Remove the adapter and sequences with a length less than 20bp;

(4) Using Trinity software (<https://github.com/trinityrnaseq/trinityrnaseq/wiki>) assembles short fragment sequences, including three steps: Inchworm, Chrysalis, and Butterfly.

(5) TransRate (<http://hibberdlab.com/transrate/>) and CD-HIT (<http://weizhongli-lab.org/cd-hit/>) were employed to remove the redundant and similar sequences. Using software BUSCO (Benchmarking Universal Single Copy Orthologs, <http://busco.ezlab.org>) to evaluate the assembly integrity of transcriptome.

## **3. RNA seq differential expression analysis**

Using software RSEM (<http://deweylab.github.io/RSEM/>) to analyze the genes expression level analysis and locate the number of reads counts in the genome region to calculate the gene expression level. Next, the software edgeR (<http://www.bioconductor.org/packages/2.12/bioc/html/edgeR.html>) or DESeq2 (<http://bioconductor.org/packages/stats/bioc/DESeq2/>) was used to analyze the differential

expression of genes and identify the differentially expressed genes between samples.  $FDR < 0.05$  and  $|\log_2FC| \geq 1$  was considered as a differentially expressed gene.

#### **4. RNA seq Functional Enrichment Analysis**

Using the KEGG database (<http://www.genome.jp/kegg/>) to analyze the pathway enrichment of differentially expressed genes ( $p < 0.05$  was considered significant enrichment). Finally, the potential pathways and targets of action were identified.

**Table S1 Amino acid composition of SCP.**

| Amino acid | Absolute content rate (%) |
|------------|---------------------------|
| Asp        | 8.48                      |
| Glu        | 12.92                     |
| Ser        | 3.00                      |
| Gly        | 20.37                     |
| His        | 0.29                      |
| Arg        | 6.22                      |
| Thr        | 3.91                      |
| Ala        | 9.57                      |
| Pro        | 8.60                      |
| Tyr        | 0.88                      |
| Val        | 2.85                      |
| Met        | 0.74                      |
| Cys        | 0.11                      |
| Ile        | 1.40                      |
| Leu        | 2.69                      |
| Phe        | 0.65                      |
| Lys        | 0.95                      |

**Table S2 Food intake.**

|               | 1 <sup>st</sup> week  | 2 <sup>nd</sup> week | 3 <sup>rd</sup> week | 4 <sup>th</sup> week | 5 <sup>th</sup> week | 6 <sup>th</sup> week |
|---------------|-----------------------|----------------------|----------------------|----------------------|----------------------|----------------------|
|               | (g/per mouse/one day) |                      |                      |                      |                      |                      |
| Blank+Vehicle | 4.77±0.96             | 4.24±0.54            | 4.19±0.27            | 4.03±0.38            | 4.04±0.25            | 3.94±0.37            |
| AES+Vechicle  | 4.2±0.00              | 3.77±0.18            | 3.72±0.07            | 3.92±0.15            | 3.82±0.10            | 3.88±0.11            |
| AES+SCPL      | 4.09±0.27             | 3.80±0.30            | 3.55±0.31            | 3.65±0.01            | 3.68±0.06            | 3.58±0.28            |
| AES+SCPH      | 4.10±0.02             | 3.93±0.14            | 3.75±0.07            | 3.87±0.30            | 3.76±0.18            | 3.66±0.10            |

Data are expressed as mean ± SD (n=8). Compared with the Blank+Vehicle group, \* is p<0.05, and \* is p<0.01. Compared with the AES+Vehicle group, # is p<0.05, # is p<0.01, and unmarked indicates no statistical difference (p>0.05).

**Table S3 Organ index of mice.**

|               | Organ indexes (%) |           |            |                 |            |            |
|---------------|-------------------|-----------|------------|-----------------|------------|------------|
|               | Liver             | Kidney    | Testis     | Seminal vesicle | Epididymis | Penis      |
| Blank+Vehicle | 5.29±0.38         | 1.50±0.06 | 0.67±0.09  | 0.74±0.12       | 0.27±0.07  | 0.15±0.01  |
| AES+Vehicle   | 4.99±0.25         | 1.47±0.18 | 0.73±0.04  | 0.48±0.11**     | 0.28±0.07  | 0.11±0.04* |
| AES+SCPL      | 5.22±0.35         | 1.43±0.09 | 0.77±0.07* | 0.65±0.12       | 0.31±0.08  | 0.16±0.02# |
| AES+SCPH      | 5.15±0.52         | 1.45±0.16 | 0.77±0.08  | 0.63±0.16       | 0.32±0.09  | 0.16±0.02# |

Data are expressed as mean ± SD (n=8). Compared with the Blank+Vehicle group, \* is p<0.05, and \* is p<0.01. Compared with the AES+Vehicle group, # is p<0.05, # is p<0.01, and unmarked indicates no statistical difference (p>0.05).

**Table S4 Serum biomarkers comparison at negative iron model (Top25).**

| No. | Metabolite                                 | m/z    | Fold<br>change1 | Trend1<br>(TrnM) | VIP1 | P-Value1 | Fold<br>change2 | Trend2<br>(TrnM) | VIP2 | P-Value2 |
|-----|--------------------------------------------|--------|-----------------|------------------|------|----------|-----------------|------------------|------|----------|
| 1   | L-Tryptophan                               | 203.08 | 2.35            | +                | 5.57 | 0.00000  | 0.47            | -                | 5.20 | 0.00000  |
| 2   | Pentadecanoic Acid                         | 241.22 | 1.57            | +                | 2.42 | 0.00000  | 0.74            | -                | 1.93 | 0.00052  |
| 3   | Indole                                     | 116.05 | 2.14            | +                | 1.19 | 0.00000  | 0.51            | -                | 1.12 | 0.00000  |
| 4   | L-Aspartate                                | 132.03 | 1.65            | +                | 1.22 | 0.00001  | 0.61            | -                | 1.26 | 0.00002  |
| 5   | Uridine                                    | 243.06 | 2.34            | +                | 7.45 | 0.00006  | 0.53            | -                | 6.47 | 0.00116  |
| 6   | 9,10-DiHOME                                | 313.24 | 2.18            | +                | 3.22 | 0.00010  | 0.59            | -                | 2.56 | 0.00408  |
| 7   | Sphingosine-1-phosphate                    | 378.24 | 0.63            | -                | 1.01 | 0.00014  | 1.83            | +                | 1.11 | 0.00001  |
| 8   | Succinate                                  | 117.02 | 1.47            | +                | 1.09 | 0.00018  | 0.71            | -                | 1.13 | 0.00053  |
| 9   | Deoxycholic acid                           | 391.28 | 1.95            | +                | 2.12 | 0.00065  | 0.68            | -                | 1.63 | 0.01269  |
| 10  | Myristoleic acid                           | 225.18 | 0.40            | -                | 2.41 | 0.00112  | 3.36            | +                | 2.83 | 0.00666  |
| 11  | Genistein                                  | 269.05 | 2.28            | +                | 1.56 | 0.00114  | 0.38            | -                | 1.82 | 0.00095  |
| 12  | L-Malic acid                               | 133.01 | 1.76            | +                | 1.20 | 0.00119  | 0.61            | -                | 1.20 | 0.00482  |
| 13  | 3-Methoxy-4-Hydroxyphenylglycol<br>Sulfate | 263.02 | 1.67            | +                | 1.25 | 0.00147  | 0.66            | -                | 1.09 | 0.00384  |
| 14  | Dihomo-gamma-Linolenic                     | 305.25 | 2.06            | +                | 2.03 | 0.00232  | 0.55            | -                | 1.99 | 0.05342  |
| 15  | DL-lactate                                 | 89.02  | 1.26            | +                | 3.09 | 0.00236  | 0.79            | -                | 4.68 | 0.00144  |
| 16  | Thymine                                    | 125.03 | 1.52            | +                | 1.03 | 0.00707  | 0.52            | -                | 1.13 | 0.00105  |
| 17  | Xanthosine                                 | 283.07 | 2.49            | +                | 2.10 | 0.01115  | 0.37            | -                | 2.20 | 0.00665  |
| 18  | Uric acid                                  | 167.02 | 2.07            | +                | 2.21 | 0.01250  | 0.44            | -                | 2.31 | 0.00360  |
| 19  | Daidzein                                   | 253.05 | 1.78            | +                | 1.13 | 0.01616  | 0.49            | -                | 1.40 | 0.00624  |
| 20  | 3R-hydroxy-butanoic acid                   | 103.04 | 0.36            | -                | 1.91 | 0.01731  | 2.76            | +                | 2.01 | 0.00063  |
| 21  | 3-Hydroxydodecanoic acid                   | 215.16 | 0.65            | -                | 1.21 | 0.01946  | 1.65            | +                | 1.21 | 0.03017  |
| 22  | Alpha-D-Glucose                            | 179.05 | 2.65            | +                | 1.36 | 0.02234  | 0.43            | -                | 1.43 | 0.03743  |



|    |                 |        |      |   |      |         |      |   |       |         |
|----|-----------------|--------|------|---|------|---------|------|---|-------|---------|
| 23 | L-Ascorbic acid | 197.00 | 1.30 | + | 3.50 | 0.04731 | 0.36 | - | 11.04 | 0.00076 |
| 24 | L-Glutamine     | 145.06 | 1.34 | + | 3.65 | 0.64269 | 1.08 | + | 3.71  | 0.025   |
| 25 | 9R,10S-EpOME    | 295.23 | 1.77 | + | 4.89 | 0.00001 | 0.68 | - | 3.88  | 0.00098 |

Note: Trend1 refers to the AES+Vehicle group being up-regulated as "+" and down-regulated as "-" compared to the blank+Vehicle group. Trend2 represents the upregulation of the AES+SCPH group to "+" and downregulation to "-" compared to the AES+Vehicle group.

**Table S5 Serum biomarkers comparison at positive iron model (Top25).**

| No. | Metabolite                           | m/z    | Fold change1 | Trend1 (TrnM) | VIP1 | P-Value1 | Fold change2 | Trend2 (TrnM) | VIP2 | P-Value2 |
|-----|--------------------------------------|--------|--------------|---------------|------|----------|--------------|---------------|------|----------|
| 1   | 3-Indoleacetonitrile                 | 174.10 | 1.54         | +             | 1.13 | 0.00000  | 0.60         | -             | 1.24 | 0.00000  |
| 2   | L-Tryptophan                         | 205.10 | 1.89         | +             | 1.81 | 0.00001  | 0.45         | -             | 2.03 | 0.00000  |
| 3   | Thymine                              | 127.05 | 1.77         | +             | 1.93 | 0.00003  | 0.91         | -             | 0.78 | 0.23691  |
| 4   | Creatinine                           | 114.07 | 1.27         | +             | 1.96 | 0.00004  | 0.82         | -             | 1.77 | 0.00003  |
| 5   | D-Proline                            | 116.07 | 1.45         | +             | 1.33 | 0.00006  | 0.70         | -             | 1.32 | 0.00013  |
| 6   | Tyramine                             | 120.08 | 1.29         | +             | 3.49 | 0.00008  | 0.76         | -             | 3.58 | 0.00018  |
| 7   | 20-Hydroxyarachidonic acid           | 303.23 | 1.98         | +             | 1.82 | 0.00025  | 0.65         | -             | 1.46 | 0.00231  |
| 8   | L-Leucine                            | 132.10 | 1.26         | +             | 1.45 | 0.00025  | 0.75         | -             | 1.69 | 0.00001  |
| 9   | 1-Palmitoylglycerol                  | 313.27 | 1.77         | +             | 1.52 | 0.00027  | 0.51         | -             | 1.67 | 0.00020  |
| 10  | 1-Palmitoyllysophosphatidylcholine   | 538.39 | 1.33         | +             | 4.81 | 0.00044  | 0.77         | -             | 4.42 | 0.00413  |
| 11  | Urea                                 | 61.04  | 1.16         | +             | 1.83 | 0.00145  | 0.84         | -             | 2.05 | 0.00036  |
| 12  | 1-Oleoyl-sn-glycero-3-phosphocholine | 544.35 | 0.73         | -             | 8.03 | 0.00164  | 1.41         | +             | 9.06 | 0.00626  |
| 13  | 2-Methylbutyroylcarnitine            | 246.17 | 1.33         | +             | 3.47 | 0.00337  | 0.71         | -             | 3.83 | 0.00068  |
| 14  | Daidzein                             | 255.07 | 2.73         | +             | 3.65 | 0.00493  | 0.27         | -             | 4.08 | 0.00236  |

|    |                                                         |           |      |   |      |         |      |   |       |          |
|----|---------------------------------------------------------|-----------|------|---|------|---------|------|---|-------|----------|
| 15 | 1-Stearoyl-2-oleoyl-sn-glycerol 3-phosphocholine (SOPC) | 810.60    | 0.76 | - | 4.40 | 0.00618 | 1.23 | + | 4.79  | 0.02392  |
| 16 | Indoleacetic acid                                       | 158.06    | 1.80 | + | 2.76 | 0.00661 | 0.53 | - | 3.16  | 0.00033  |
| 17 | Genistein                                               | 271.06    | 1.74 | + | 1.20 | 0.00675 | 0.38 | - | 1.59  | 0.00069  |
| 18 | Choline                                                 | 104.11    | 1.11 | + | 1.38 | 0.00677 | 0.91 | - | 1.16  | 0.04749  |
| 19 | L-Glutamine                                             | 169.06    | 0.88 | - | 1.18 | 0.01500 | 1.09 | + | 1.14  | 0.102512 |
| 20 | Glycitein                                               | 285.08    | 2.74 | + | 1.64 | 0.01693 | 0.43 | - | 1.56  | 0.03886  |
| 21 | 1-Palmitoyl-2-hydroxy-sn-glycero-3-phosphoethanolamine  | 454.28    | 0.85 | - | 1.87 | 0.01994 | 1.09 | + | 1.23  | 0.21528  |
| 22 | Acetylcarnitine                                         | 204.12    | 0.82 | - | 7.85 | 0.03353 | 1.33 | + | 10.62 | 0.00133  |
| 23 | L-Carnitine                                             | 162.11    | 0.81 | - | 2.76 | 0.03510 | 1.19 | + | 2.90  | 0.00301  |
| 24 | 1-Methylhistidine                                       | 170.09    | 1.18 | + | 1.73 | 0.04675 | 0.79 | - | 2.14  | 0.00914  |
| 25 | 1-Stearoyl-2-arachidonoyl-sn-glycerol                   | 810.60129 | 0.76 | - | 4.40 | 0.00618 | 1.28 | + | 4.28  | 0.01095  |

Note: Trend1 refers to the AES+Vehicle group being up-regulated as "+" and down-regulated as "-" compared to the blank+Vehicle group. Trend2 represents the upregulation of the AES+SCPH group to "+" and downregulation to "-" compared to the AES+Vehicle group.

**Fig. S1. The acute exhausted swimming (AES) and copulatory test**

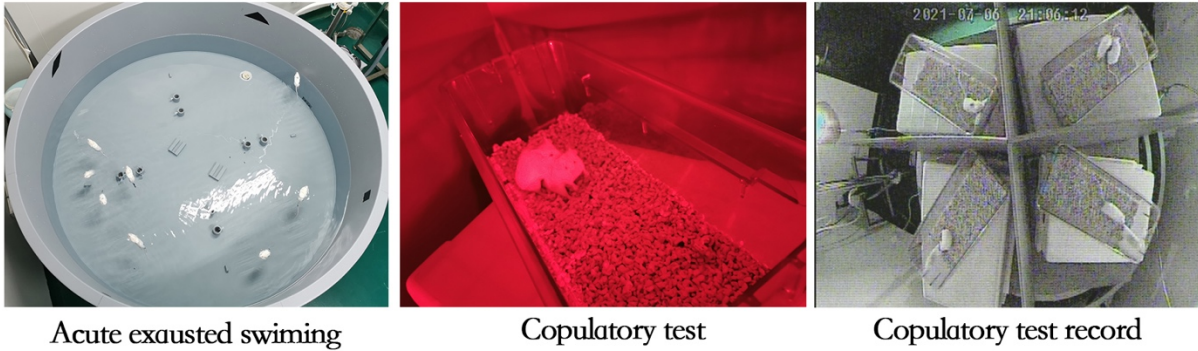

**Fig. S2. Differential serum metabolites heat map in positive mode (A) and negative mode (B).**

**Fig. S3. Serum metabolites of AES mice.**

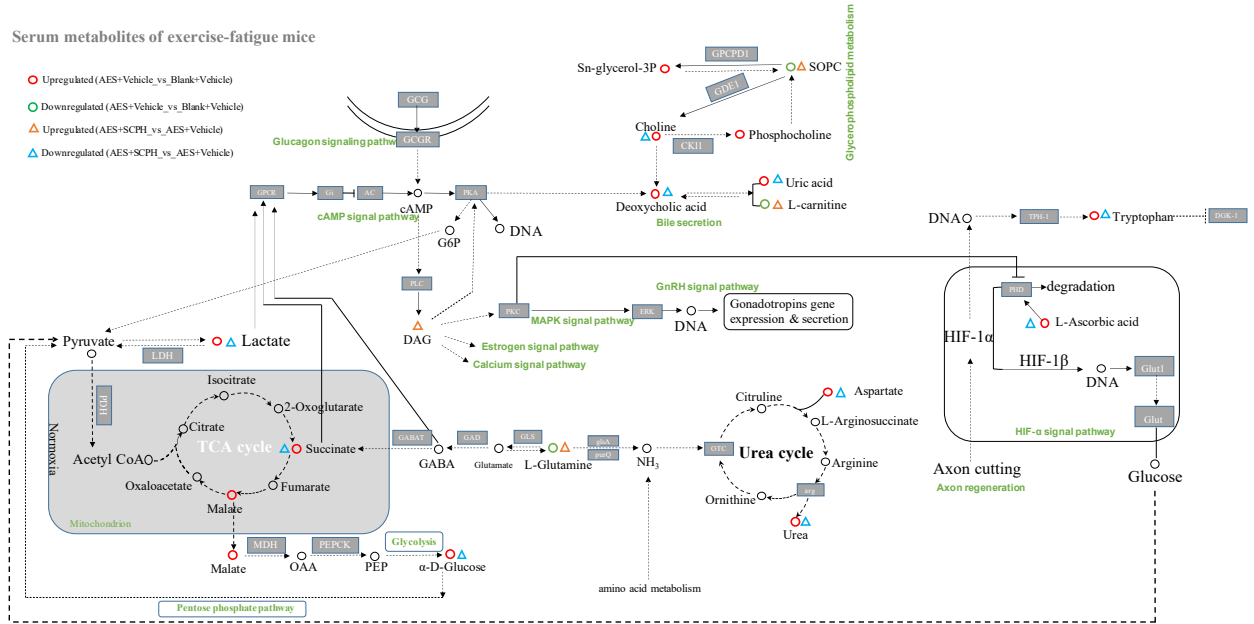

**Fig. S4. Testicular transcriptome cluster analysis of differentially expressed common genes.**

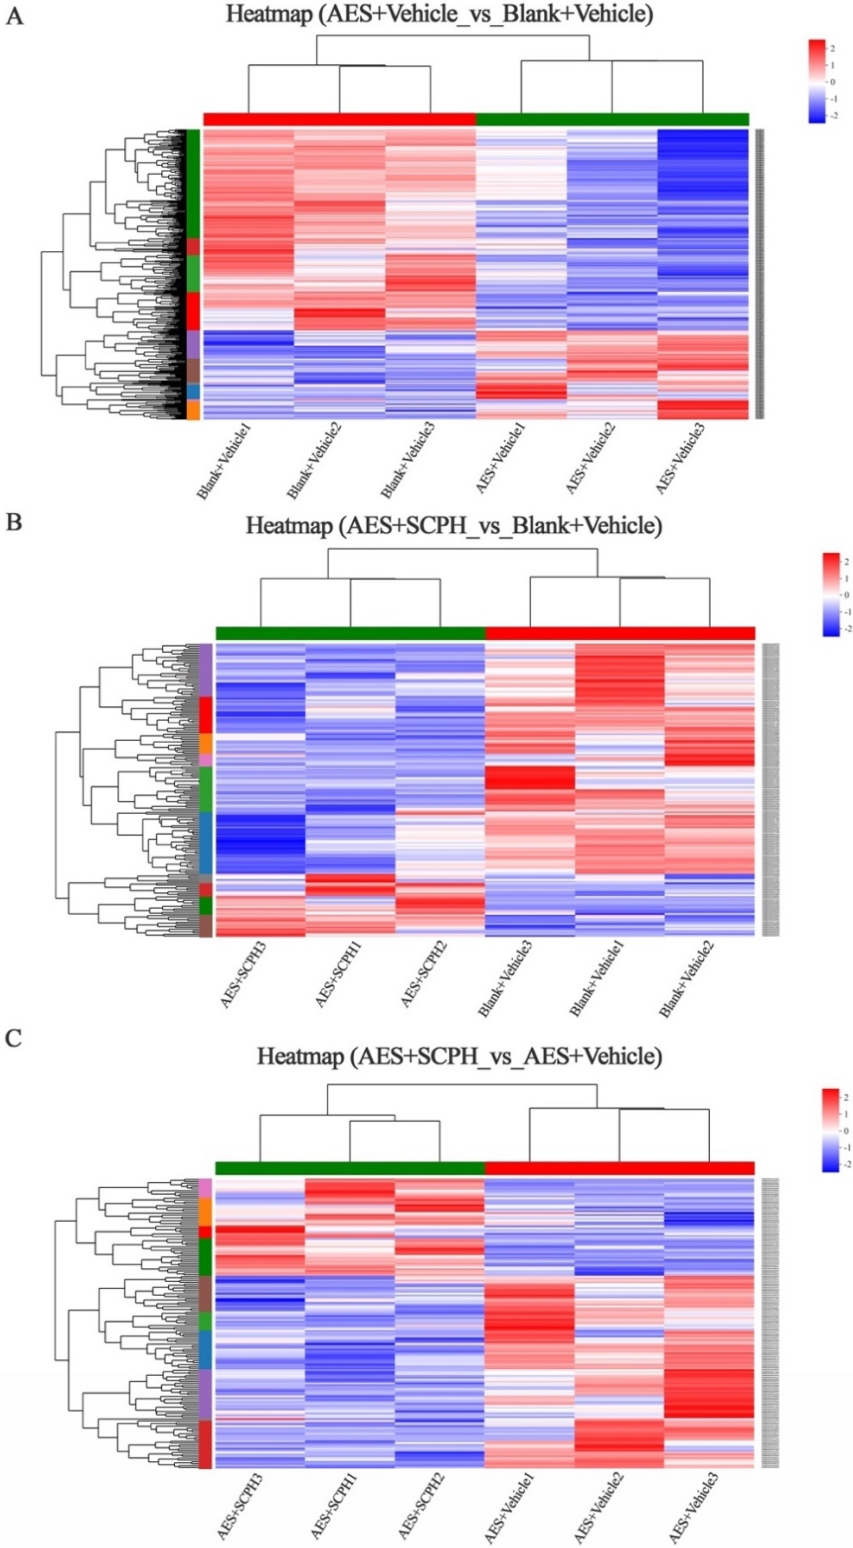

**Fig. S5. Testicular transcriptome chord diagram of KEGG pathway enrichment for AES+SCPH\_vs\_AES+Vehicle gene set.**

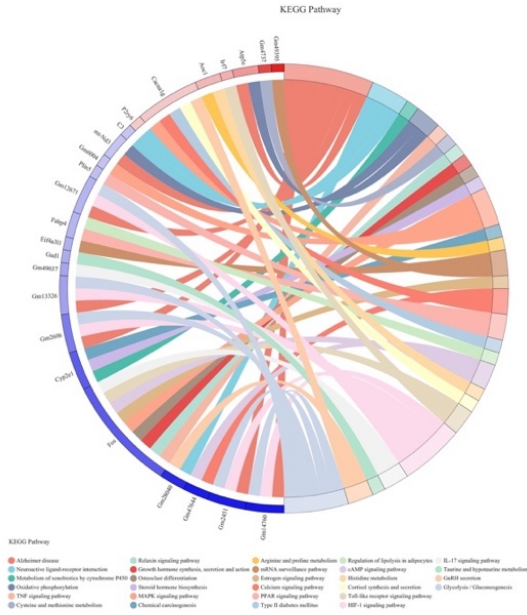

| gene name | KEGG Pathway                                                                                                                                                                                                                                                    | log2fc |
|-----------|-----------------------------------------------------------------------------------------------------------------------------------------------------------------------------------------------------------------------------------------------------------------|--------|
| Gm13326   | Alzheimer disease;HIF-1 signaling pathway;Glycolysis/Gluconeogenesis                                                                                                                                                                                            | -1.85  |
| Gad1      | Taurine and hypotaurine metabolism                                                                                                                                                                                                                              | -1.59  |
| Cacna1g   | MAPK signaling pathway;Calcium signaling pathway;Type II diabetes mellitus;Cortisol synthesis and secretion;GnRH secretion                                                                                                                                      | 1.06   |
| Gm2606    | Alzheimer disease;HIF-1 signaling pathway;Glycolysis/Gluconeogenesis;                                                                                                                                                                                           | -2.63  |
| Eif4a3l1  | mRNA surveillance pathway                                                                                                                                                                                                                                       | -1.51  |
| Gm14760   | Alzheimer disease;HIF-1 signaling pathway;Glycolysis/Gluconeogenesis                                                                                                                                                                                            | -4.81  |
| Irf7      | Toll-like receptor signaling pathway                                                                                                                                                                                                                            | 1.63   |
| Gm2451    | Alzheimer disease;HIF-1 signaling pathway;Glycolysis/Gluconeogenesis                                                                                                                                                                                            | -4.72  |
| Gm4737    | Cysteine and methionine metabolism                                                                                                                                                                                                                              | 4.00   |
| Gm6004    | MAPK signaling pathway                                                                                                                                                                                                                                          | -1.10  |
| Atp5e     | Alzheimer disease;Oxidative phosphorylation                                                                                                                                                                                                                     | 2.15   |
| Plin5     | PPAR signaling pathway                                                                                                                                                                                                                                          | -1.18  |
| P2ry6     | Neuroactive ligand-receptor interaction                                                                                                                                                                                                                         | 1.05   |
| Fabp4     | PPAR signaling pathway;Regulation of lipolysis in adipocytes                                                                                                                                                                                                    | -1.41  |
| C3        | Neuroactive ligand-receptor interaction                                                                                                                                                                                                                         | -1.04  |
| Fos       | TNF signaling pathway;Relaxin signaling pathway;Growth hormone synthesis, secretion and action;Osteoclast differentiation;MAPK signaling pathway;Estrogen signaling pathway;cAMP signaling pathway;Toll-like receptor signaling pathway;IL-17 signaling pathway | -3.33  |
| Gm28040   | Neuroactive ligand-receptor interaction;GnRH secretion                                                                                                                                                                                                          | -4.40  |
| Gm12671   | Alzheimer disease;HIF-1 signaling pathway;Glycolysis/Gluconeogenesis                                                                                                                                                                                            | -1.40  |
| mt-Nd3    | Alzheimer disease;Oxidative phosphorylation                                                                                                                                                                                                                     | -1.04  |
| Cyp2e1    | Metabolism of xenobiotics by cytochrome P450;Steroid hormone biosynthesis;Chemical carcinogenesis                                                                                                                                                               | -3.29  |
| Gm47644   | Calcium signaling pathway;cAMP signaling pathway                                                                                                                                                                                                                | -4.69  |
| Aoc1      | Arginine and proline metabolism;Histidine metabolism                                                                                                                                                                                                            | 1.46   |
| Gm49395   | mRNA surveillance pathway;IL-17 signaling pathway                                                                                                                                                                                                               | 4.86   |

## References

1. Z. W. Liu, N. Jiang, X. Tao, X. P. Wang, X. M. Liu and S. Y. Xiao, Assessment of Sexual Behavior of Male Mice, *J Vis Exp*, 2020, DOI: 10.3791/60154.
